# Supplementary material for: Evidence for Common Horizontal Transmission of Wolbachia among Ants and Ant Crickets: Kleptoparasitism Added to the List
Source: PubMed Central journal article supplement (PMC7355411; doi:10.3390/microorganisms8060805), 2020-05-27
Supplement: microorganisms-08-00805-s001.pdf [file microorganisms-08-00805-s001.pdf]

# Supporting information

## Supporting Methods and Results

### Screening of the filarial nematodes in ant cricket

To rule out the possibility that the detected *Wolbachia* were derived from parasitic filarial nematodes frequently found inside insects [1], we screened for the presence of filarial nematodes using two polymerase chain reaction (PCR) assays involving two nematode universal primer pairs (5.8s-1/KK-28S-22 [2]; SSU18/SSU26R [3]) that amplify the ITS2 region and 18S RNA gene of nematodes, respectively. A PCR mixture was set up in a reaction volume of 25  $\mu$ l using Takara EmeraldAmp Max PCR Master Mix (Takara, Japan). PCRs were carried out following the procedures described in main text with slight modifications (56 °C as annealing temperature for ITS2 region; 50 °C for 18S RNA gene). We detected no signs of filarial nematodes in any ant cricket samples in this study.

### *Wolbachia* strain verification in *Myrmecophilus americanus* using Illumina sequence data

The *Wolbachia* MLST gene sequences of *M. americanus* were characterized using genome sequences generated by the high-throughput sequencing method. DNA libraries were prepared from genomic DNA of three *M. americanus* collected from Taiwan using the Truseq Nano DNA HT Sample Prep Kit (Illumina, USA) for 350 bp inserts, and each DNA library was sequenced on the Illumina HiSeq 4000 platform by Genomics BioSci and Tech Corp (Taipei, Taiwan), generating 150 bp paired-end reads. Trimmomatic 0.36 [4] was employed to remove adaptor sequences and trim bases with quality lower than 20 (QV20). We detected four types of *Wolbachia* infection in *M. americanus* by sequencing *wsp* gene from a number of clones. One type of *wsp* sequence, namely *wMame2*, differed from all known *Wolbachia* strains. Three of the four types of *wsp* sequence in *M. americanus* were identical to *Wolbachia* strains *wMsp4* and *wMsp5* from ant crickets, and *wLonF* from longhorn crazy ant, *Paratrechina longicornis* (Fig. 1b, Table 2), respectively. To confirm *Wolbachia* strain identity detected in *M. americanus*, we mapped the sequencing reads of *M. americanus* onto the MLST reference sequences from *wMsp4*, *wMsp5* and *wLonF* using bowtie2 v2.3.3 [5] in the local alignment

mode. The bowtie outputs (BAM files) were deposited in Zenodo (doi: 10.5281/zenodo.3653448). *Wolbachia* type *wMame2* was excluded from the analysis because reference sequences of *wMame2*-like *Wolbachia* were not available. Integrative Genomics Viewer (IGV version 2.5.3) was used to visualize the mapping [6]. Multiple reads matched with the entire reference sequences perfectly, with one exception: the reference sequence *fbpA* of *wLonF* was only partially aligned (Figure S1E). Therefore, a primer pair, [FbpwLonF-F (5'- GCTCCAATTCTTTGCATTCAA-3') and FbpwLonF-R (5'- CCAATTCGTTTGGATAACGAT-3')], was designed to amplify the *fbpA* sequence unique to *wLonF* in *M. americanus* samples. The PCR conditions included an initial denaturation step at 95°C (3 min) followed by 35 cycles of 94°C (30 s), 55°C (30 s), 72°C (1 min) and a final extension phase at 72°C (7 min). The PCR amplicons were purified and sequenced. A total of five *M. americanus* infected with *wMame1* were sequenced in both directions by using the specific primers. The results indicated that the sequences obtained from *M. americanus* were identical to the *fbpA* sequence of *wLonF*. Summing up, we conclude that the *Wolbachia* in *M. americanus* were identical to *wMsp4*, *wMsp5* and *wLonF* at both *wsp* and MLST loci, assuming no sequence recombination among strains.

#### Determination of *Wolbachia* MLST alleles in *Camponotus* sp. triple infection samples

Results of *wsp* sequencing indicated that the ant samples from *Camponotus* sp. colony were infected with three types of *Wolbachia*, *wCamA1*, *wCamA2* and *wCamA3*. The *wsp* sequences of *wCamA1*, and *wCamA3* were identical to *wMsp6* and *wMsp4*, while *wCamA2* was identical to *Wolbachia* strains previously reported from ants *Rhytidoponera metallica* (Strain: Rmet\_A; PubMLST id: #122) and *Pheidole* sp. (Phe\_A\_19-04; PubMLST id: #127). We utilized both nanopore-based sequencing and Sanger sequencing to characterize *Wolbachia* MLST allele profiles for these three *Wolbachia* strains. The PCR amplicons of *Wolbachia* MLST genes were purified by using the Gel/PCR Extraction Kit (Nippon Gene, Japan) and 1 mg of purified DNA (200 ng for each gene) was used to construct nanopore sequencing library using the Oxford Nanopore Technologies SQK-LSK109 kit following the manufacturer's instructions. Sequencing was performed on an Oxford Nanopore Technologies (Oxford, UK) MinION (MIN-101B) with FLO-MINSP6 flow cell. The sequencing run was terminated after 2 h and generated 449,808 reads. Reads with an average Q-score lower than 10 or of a length

smaller than 360 bp were filtered out through NanoFilt v 2.6.0 [7], resulting in 24,674 remaining sequences. We mapped all the filtered sequencing reads onto the MLST reference sequences from *wMsp6* using bowtie2 v2.3.3 [5] in the local alignment mode. The bowtie outputs (BAM files) were deposited in Zendo (doi: 10.5281/zenodo.3653448). Integrative Genomics Viewer (IGV version 2.5.3) was used to visualize the mapping results and recover MLST haplotypes with SNPs that are identified in the mapping results [6]. All the SNPs detected by mapping were validated by bi-directional Sanger sequencing of the five MLST loci. The mapping result indicated that the five MLST loci were represented by three alleles each, and allele types were identical or nearly identical to MLST alleles found in one of the following *wMsp4*, *wMsp6* or Phe\_A\_19-04 (1 bp difference from *wMsp4* at *fbpA*; 1 bp difference from Phe\_A\_19-04 at *gatB* and *fbpA*). The MLST allele profile of *wCamA1*, *wCamA2* and *wCamA3* was constructed based on the strain information of *wMsp4*, *wMsp6* or Phe\_A\_19-04, assuming no sequence recombination among strains.

#### Reconstruction of *wsp* gene tree

We estimated the *wsp* gene tree using a maximum-likelihood (ML) method with RAxML Blackbox web-servers [8]. All available *Wolbachia* sequences from orthopteran insects and ants were downloaded from GenBank and *Wolbachia* PubMLST database and included in the analysis after excluding redundant sequences. Alignment of *wsp* dataset was constructed on the GUIDANCE2 Server [9] based on codons using the MAFFT algorithm [10], and ambiguous alignments with the confidence score below 0.7 were excluded (426 bp remained). The nucleotide substitution models and best partitioning schemes were estimated with PartitionFinder version 2.1.1 [11] using the Akaike information criterion and a heuristic search algorithm. The best partitioning scheme selected by PartitionFinder for *wsp* gene were data partitioned by codon positions under the GTR+I+G model of rate substitution.

## References

1. Fox, L.M. Blood and tissue nematodes: Filarial Worms. In *Principles and Practice of Pediatric Infectious Diseases*, 5th ed. Amsterdam, the Netherlands: Elsevier; **2017**. pp. 1388-1394.e1.
2. Barrière, A.; Félix, M.-A. Isolation of *C. elegans* and Related Nematodes. In *Wormbook* **2006**, 2, 1–19.
3. Floyd, R.; Abebe, E.; Papert, A.; Blaxter, M. Molecular barcodes for soil nematode identification. *Mol. Ecol.* **2002**, 11, 839–850, doi:10.1046/j.1365-294X.2002.01485.x.
4. Bolger, A.M.; Lohse, M.; Usadel, B. Trimmomatic: a flexible trimmer for Illumina sequence data. *Bioinformatics* **2014**, 30, 2114–2120, doi:10.1093/bioinformatics/btu170.
5. Langmead, B.; Salzberg, S.L. Fast gapped-read alignment with Bowtie 2. *Nat. Methods* **2012**, 9, 357, doi:10.1038/nmeth.1923.
6. Robinson, J.T.; Thorvaldsdóttir, H.; Wenger, A.M.; Zehir, A.; Mesirov, J.P. Variant review with the integrative genomics viewer. *Cancer Res.* **2017**, 77, e31-e34, doi: 10.1158/0008-5472.CAN-17-0337.
7. De Coster, W.; D’Hert, S.; Schultz, D.T.; Cruts, M.; Van Broeckhoven, C. NanoPack: visualizing and processing long-read sequencing data. *Bioinformatics* **2018**, 34, 2666–2669, doi: 10.1093/bioinformatics/bty149.
8. Kozlov, A.; Darriba, D.; Flouri, T.; Morel, B.; Stamatakis, A. RAxML-NG: a fast; scalable and user-friendly tool for maximum likelihood phylogenetic inference. **2019**, <https://doi.org/10.1093/bioinformatics/btz305> available at: <https://raxml-ng.vital-it.ch/#/>
9. Penn, O.; Privman, E.; Ashkenazy, H.; Landan, G.; Graur, D.; Pupko, T. GUIDANCE: a web server for assessing alignment confidence scores. *Nucleic Acids Res.* **2010**, 38, W23–W28, doi:10.1093/nar/gkq443.
10. Katoh, K.; Standley, D.M. MAFFT multiple sequence alignment software version 7: Improvements in performance and usability. *Mol. Biol. Evol.* **2013**, 30, 772–780, doi:10.1093/molbev/mst010.
11. Lanfear, R.; Calcott, B.; Ho, S.Y.W.; Guindon, S. PartitionFinder: combined selection of partitioning schemes and substitution models for phylogenetic analyses. *Mol. Biol. Evol.* **2012**, 29, 1695–1701, doi:10.1093/molbev/mss020.
12. Ooi M. Integration, morphological differences and behavioural adaptations of ant crickets from the family Myrmecophilidae in association with host ants, *Paratrechina longicornis* and *Anoplolepis gracilipes* (Hymenoptera: Formicidae) (Unpublished master's thesis). **2019**, School of Biological Sciences, Universiti Sains Malaysia, Malaysia.

13. Komatsu, T.; Maruyama, M.; Itino, T. Behavioral differences between two ant cricket species in Nansei islands: Host-specialist versus host-generalist. *Insectes Soc.* **2009**, *56*, 389–396, doi:10.1007/s00040-009-0036-y.
14. Maruyama, M. Family Myrmecophilidae Saussure, 1870. In: *Orthopterological Society of Japan*. (Ed.) Orthoptera of the Japanese Archipelago in Color. Hokkaido University Press, Hokkaido, **2006**, 490–492 pp.
15. Wetterer, J.K.; Hugel, S. Worldwide spread of the ant cricket *Myrmecophilus americanus*, a symbiont of the longhorn crazy ant, *Paratrechina longicornis*. *Sociobiology* **2008**, *52*, 157–165.
16. Hsu, P.W.; Hugel, S.; Wetterer, J.K.; Tseng, S.P.; Ooi, C.S.M.; Lee, Y.; Yang, C.C.S. Ant crickets (Orthoptera: Myrmecophilidae) associated with the invasive yellow crazy ant *Anoplolepis gracilipes* (Hymenoptera: Formicidae): evidence for cryptic species and potential co-introduction with hosts. *Myrmecol. News* **2020**, *30*: 103–129, doi: 10.25849/myrmecol.news\_030:103.
17. Wasmann, E. Kritisches Verzeichniss der Myrmekophilen und Termitophilen Arthropoden: Mit Angabe der Lebensweise und mit Beschreibung neuer Arten. Verlag Von Felix L. Dames, Berlin. **1894**, 231 pp.
18. Kistner, D.H.; Chong, K.F.; Lee, C.Y. A new Malaysian *Myrmecophilous* cricket (Orthoptera: Myrmecophilidae). *Sociobiology* **2007**, *50*, 173–182.
19. Mann, W.M. Ant guests from Fiji and the British Solomon Islands. *Ann. Entomol. Soc. Am.* **1920**, *13*, 60–69, doi:10.1093/aesa/13.1.60.
20. Komatsu, T.; Maruyama, M.; Ueda, S.; Itino, T. MtDNA phylogeny of Japanese ant crickets (Orthoptera: Myrmecophilidae): Diversification in host specificity and habitat use. *Sociobiology* **2008**, *52*, 553–565.
21. Desutter-Grandcolas, L. First record of ant-loving crickets (Orthoptera: Myrmecophilidae: Myrmecophilinae) in New Caledonia. *Aust. J. Entomol.* **1997**, *36*, 159–163, doi:10.1111/j.1440-6055.1997.tb01449.x.
22. Komatsu, T.; Maruyama, M. Additional records of the distribution and host ant species for the ant cricket *Myrmophilellus pilipes*. *Insectes Soc.* **2016**, *63*, 623–627, doi:10.1007/s00040-016-0496-9.
23. Zhou, W.; Rousset, F.; O'Neill, S. Phylogeny and PCR-based classification of *Wolbachia* strains using *wsp* gene sequences. *Proc. R. Soc. London. Ser. B Biol. Sci.* **1998**, *265*, 509–515, doi:10.1098/rspb.1998.0324.

**Table S1 Behavioral differences between non-integrated and integrated ant crickets based on Ooi (2019) [12]**

|                                | <b>Non-integrated ant crickets</b>                                                                                                             | <b>Integrated ant crickets</b>                                                 |
|--------------------------------|------------------------------------------------------------------------------------------------------------------------------------------------|--------------------------------------------------------------------------------|
| Preferred location in ant nest | Peripheral                                                                                                                                     | Within nest                                                                    |
| Feeding                        | Feed on food without the aid of host ants                                                                                                      | Feed via mouth-to-mouth trophallaxis by ant worker                             |
| Trophallaxis                   | Unable to initiate the trophallaxis with host ants, but sometimes interrupt trophallaxis by two ant workers to take the food being transferred | Able to initiate trophallaxis with host ants                                   |
| Consume ant brood              | Often                                                                                                                                          | Rare                                                                           |
| Interaction with ant host      | Avoid contact with ant and escape rapidly by running and jumping                                                                               | Come into contact with an ant worker and groom it, licking the body of the ant |
| Level of host dependence       | Medium to low, able to survive more than 2 months without host ants                                                                            | High, unable to survive more than 1 month without host ants                    |

**Table S2 Recorded host ants of the tested ant cricket species**

| Recorded hosts                   | List of host ant species                                                                                                                                                                                                                                                                                                                                                                  | References       |
|----------------------------------|-------------------------------------------------------------------------------------------------------------------------------------------------------------------------------------------------------------------------------------------------------------------------------------------------------------------------------------------------------------------------------------------|------------------|
| <i>Myrmecophilus albicinctus</i> | <i>Anoplolepis gracilipes</i> (major), <i>Pheidole</i> sp. (one record)                                                                                                                                                                                                                                                                                                                   | [13, 14]         |
| <i>Myrmecophilus americanus</i>  | <i>Paratrechina longicornis</i> (major), <i>Camponotus</i> sp. (one record)                                                                                                                                                                                                                                                                                                               | [15]             |
| <i>Myrmecophilus antilucanus</i> | <i>Anoplolepis gracilipes</i>                                                                                                                                                                                                                                                                                                                                                             | [16]             |
| <i>Myrmecophilus dubius</i>      | <i>Anoplolepis gracilipes</i> (major)                                                                                                                                                                                                                                                                                                                                                     | [16, 17]         |
| <i>Myrmecophilus hebari</i>      | <i>Paratrechina longicornis</i> (major), <i>Camponotus</i> sp. (one record)                                                                                                                                                                                                                                                                                                               | [16, 18, 19]     |
| <i>Myrmecophilus quadrispina</i> | <i>Anoplolepis gracilipes</i> , <i>Paratrechina longicornis</i> , <i>Solenopsis invicta</i> , <i>Solenopsis geminata</i> , <i>Pheidole megacephala</i> , <i>Carebara diversus</i> , <i>Polyrhachis dives</i> , <i>Nylanderia amia</i> , <i>Camponotus kaguya</i> , <i>Pheidole noda</i> , <i>Pheidole parva</i> , <i>Pheidole</i> sp., <i>Diacamma</i> sp., <i>Brachyponera chinensis</i> | [16, 13, 20, 21] |
| <i>Myrmophilellus pilipes</i>    | <i>Anoplolepis gracilipes</i> , <i>Paratrechina longicornis</i> , <i>Camponotus</i> sp., <i>Diacamma</i> spp., <i>Pheidole megacephala</i> , <i>Pheidole</i> sp., <i>Solenopsis geminata</i> , <i>Dolichoderus thoracicus</i> , <i>Carebara diversus</i> , <i>Proatta butteli</i> , <i>Philidris cordata</i>                                                                              | [16, 22]         |

**Table S3 Profile information of the ant cricket samples used in this study**

| Sample      | Species                          | <i>Wolbachia</i> strain | Host ant species              | Host <i>Wolbachia</i> type | Locality                                                |
|-------------|----------------------------------|-------------------------|-------------------------------|----------------------------|---------------------------------------------------------|
| AnoTH04C04  | <i>Myrmecophilus albicinctus</i> | <i>wMsp4, wMsp8</i>     | <i>Anoplolepis gracilipes</i> | <i>wAgra</i>               | Thailand<br>Nong Sarai, Pak Chong District              |
| AnoBOT01C03 | <i>Myrmecophilus albicinctus</i> | <i>wMsp1</i>            | <i>Anoplolepis gracilipes</i> | <i>wAgra</i>               | Malaysia<br>Botanical Garden, Jalan Kebun Bunga, Penang |
| AnoKIC03    | <i>Myrmecophilus albicinctus</i> | <i>wMsp1</i>            | <i>Anoplolepis gracilipes</i> | <i>wAgra</i>               | Malaysia<br>Penang National Park, Pulau Pinang          |
| Anomy35C01  | <i>Myrmecophilus albicinctus</i> | <i>wMsp1</i>            | <i>Anoplolepis gracilipes</i> | Uninfected                 | Malaysia<br>Aman Hostel, USM                            |
| Anomy36C02  | <i>Myrmecophilus albicinctus</i> | <i>wMsp1</i>            | <i>Anoplolepis gracilipes</i> | <i>wAgra</i>               | Malaysia<br>Subaidah,USM                                |
| Anomy36C03  | <i>Myrmecophilus albicinctus</i> | <i>wMsp1</i>            | <i>Anoplolepis gracilipes</i> | <i>wAgra</i>               | Malaysia<br>Subaidah,USM                                |
| Ano84.C01   | <i>Myrmecophilus albicinctus</i> | <i>wMsp1</i>            | <i>Anoplolepis gracilipes</i> | <i>wAgra</i>               | Taiwan<br>Daxi Dist., Taoyuan City                      |
| Ano84.C02   | <i>Myrmecophilus albicinctus</i> | <i>wMsp1</i>            | <i>Anoplolepis gracilipes</i> | <i>wAgra</i>               | Taiwan<br>Daxi Dist., Taoyuan City                      |
| Ano84.C03   | <i>Myrmecophilus albicinctus</i> | <i>wMsp1</i>            | <i>Anoplolepis gracilipes</i> | <i>wAgra</i>               | Taiwan<br>Daxi Dist., Taoyuan City                      |
| Ano84.C04   | <i>Myrmecophilus albicinctus</i> | <i>wMsp1</i>            | <i>Anoplolepis gracilipes</i> | <i>wAgra</i>               | Taiwan<br>Daxi Dist., Taoyuan City                      |
| Ano125C02   | <i>Myrmecophilus albicinctus</i> | <i>wMsp1, wMsp8</i>     | <i>Anoplolepis gracilipes</i> | NA                         | Taiwan<br>Taitung Dawu Township                         |
| Ano125C04   | <i>Myrmecophilus albicinctus</i> | <i>wMsp1, wMsp8</i>     | <i>Anoplolepis gracilipes</i> | NA                         | Taiwan<br>Taitung Dawu Township                         |
| Ano125C05   | <i>Myrmecophilus albicinctus</i> | <i>wMsp1, wMsp8</i>     | <i>Anoplolepis gracilipes</i> | NA                         | Taiwan<br>Taitung Dawu Township                         |
| Ano125C06   | <i>Myrmecophilus albicinctus</i> | <i>wMsp1, wMsp8</i>     | <i>Anoplolepis gracilipes</i> | NA                         | Taiwan<br>Taitung Dawu Township                         |
| Ano125C08   | <i>Myrmecophilus albicinctus</i> | <i>wMsp1, wMsp8</i>     | <i>Anoplolepis gracilipes</i> | NA                         | Taiwan<br>Taitung Dawu Township                         |
| Ano125C09   | <i>Myrmecophilus albicinctus</i> | <i>wMsp1, wMsp8</i>     | <i>Anoplolepis gracilipes</i> | NA                         | Taiwan<br>Taitung Dawu Township                         |
| AgrJP18.4C1 | <i>Myrmecophilus albicinctus</i> | <i>wMsp4, wMsp8</i>     | <i>Anoplolepis gracilipes</i> | NA                         | Japan<br>Ryudai, Nakagami District, Okinawa             |
| AnoJP46C02  | <i>Myrmecophilus albicinctus</i> | <i>wMsp4, wMsp8</i>     | <i>Anoplolepis gracilipes</i> | <i>wAgra</i>               | Japan<br>Onna-son, Kunigami-gun, Okinawa                |
| AnoJP47C04  | <i>Myrmecophilus albicinctus</i> | <i>wMsp4, wMsp8</i>     | <i>Anoplolepis gracilipes</i> | <i>wAgra</i>               | Japan<br>Onna-son, Kunigami-gun, Okinawa                |



|             |                                  |              |                               |            |          |                                             |
|-------------|----------------------------------|--------------|-------------------------------|------------|----------|---------------------------------------------|
| AnoJP48C01  | <i>Myrmecophilus albicinctus</i> | wMsp4, wMsp8 | <i>Anoplolepis gracilipes</i> | wAgra      | Japan    | Onna-son, Kunigami-gun, Okinawa             |
| AnoJP49C02  | <i>Myrmecophilus albicinctus</i> | wMsp4, wMsp8 | <i>Anoplolepis gracilipes</i> | wAgra      | Japan    | Onna-son, Kunigami-gun, Okinawa             |
| AnoTH04C02  | <i>Myrmecophilus albicinctus</i> | wMsp4, wMsp8 | <i>Anoplolepis gracilipes</i> | Uninfected | Thailand | Nong Sarai, Pak Chong District              |
| AnoNT01c02  | <i>Myrmecophilus albicinctus</i> | wMsp8        | <i>Anoplolepis gracilipes</i> | wAgra      | Taiwan   | Chushan Township, Nantou County             |
| AnoNT01c04  | <i>Myrmecophilus albicinctus</i> | wMsp8        | <i>Anoplolepis gracilipes</i> | wAgra      | Taiwan   | Chushan Township, Nantou County             |
| AnoNT01c06  | <i>Myrmecophilus albicinctus</i> | wMsp8        | <i>Anoplolepis gracilipes</i> | wAgra      | Taiwan   | Chushan Township, Nantou County             |
| AnoNT01c09  | <i>Myrmecophilus albicinctus</i> | wMsp8        | <i>Anoplolepis gracilipes</i> | wAgra      | Taiwan   | Chushan Township, Nantou County             |
| AnoNT01c11  | <i>Myrmecophilus albicinctus</i> | wMsp8        | <i>Anoplolepis gracilipes</i> | wAgra      | Taiwan   | Chushan Township, Nantou County             |
| AnoNT01c12  | <i>Myrmecophilus albicinctus</i> | wMsp8        | <i>Anoplolepis gracilipes</i> | wAgra      | Taiwan   | Chushan Township, Nantou County             |
| AnoBOT01C01 | <i>Myrmecophilus albicinctus</i> | Uninfected   | <i>Anoplolepis gracilipes</i> | wAgra      | Malaysia | Botanical Garden, Jalan Kebun Bunga, Penang |
| AnoKIC04    | <i>Myrmecophilus albicinctus</i> | Uninfected   | <i>Anoplolepis gracilipes</i> | wAgra      | Malaysia | Penang National Park, Pulau Pinang          |
| AnoKIC06    | <i>Myrmecophilus albicinctus</i> | Uninfected   | <i>Anoplolepis gracilipes</i> | wAgra      | Malaysia | Penang National Park, Pulau Pinang          |
| Anomy35C09  | <i>Myrmecophilus albicinctus</i> | Uninfected   | <i>Anoplolepis gracilipes</i> | Uninfected | Malaysia | Aman Hostel, USM                            |
| Anomy35C10  | <i>Myrmecophilus albicinctus</i> | Uninfected   | <i>Anoplolepis gracilipes</i> | Uninfected | Malaysia | Aman Hostel, USM                            |
| Anomy35C11  | <i>Myrmecophilus albicinctus</i> | Uninfected   | <i>Anoplolepis gracilipes</i> | Uninfected | Malaysia | Aman Hostel, USM                            |
| Anomy35C12  | <i>Myrmecophilus albicinctus</i> | Uninfected   | <i>Anoplolepis gracilipes</i> | Uninfected | Malaysia | Aman Hostel, USM                            |
| mal20       | <i>Myrmecophilus albicinctus</i> | Uninfected   | <i>Anoplolepis gracilipes</i> | NA         | Malaysia | Pulau Pinang                                |

|                  |                                  |                                 |                                 |              |            |                          |
|------------------|----------------------------------|---------------------------------|---------------------------------|--------------|------------|--------------------------|
| mal80            | <i>Myrmecophilus albicinctus</i> | Uninfected                      | <i>Anoplolepis gracilipes</i>   | NA           | Malaysia   | Pulau Pinang             |
| Ano84.C05        | <i>Myrmecophilus albicinctus</i> | Uninfected                      | <i>Anoplolepis gracilipes</i>   | wAgra        | Taiwan     | Daxi Dist., Taoyuan City |
| 07.323-1         | <i>Myrmecophilus americanus</i>  | wMsp4, wMame2                   | <i>Paratrechina longicornis</i> | Uninfected   | Antigua    | Darkwood Beach           |
| 14.489-1         | <i>Myrmecophilus americanus</i>  | wMsp4, wMsp5,<br>wMame1, wMame2 | <i>Paratrechina longicornis</i> | wLonA, wLonF | Singapore  | City Hall                |
| 12.358-10        | <i>Myrmecophilus americanus</i>  | wMsp4, wMsp5,<br>wMame1, wMame2 | <i>Paratrechina longicornis</i> | wLonA        | USA        | Virginia Key, FL         |
| 12.358-11        | <i>Myrmecophilus americanus</i>  | wMsp4, wMsp5,<br>wMame1, wMame2 | <i>Paratrechina longicornis</i> | wLonA        | USA        | Virginia Key, FL         |
| 08.818-1         | <i>Myrmecophilus americanus</i>  | wMsp4, wMsp5,<br>wMame1, wMame2 | <i>Paratrechina longicornis</i> | wLonF        | USA        | Big Pine Key, FL         |
| 08.709-3         | <i>Myrmecophilus americanus</i>  | wMsp4, wMsp5,<br>wMame1, wMame2 | <i>Paratrechina longicornis</i> | Uninfected   | Bonaire    | Kralendijk               |
| 08.745-1         | <i>Myrmecophilus americanus</i>  | wMsp4, wMsp5,<br>wMame1, wMame2 | <i>Paratrechina longicornis</i> | Uninfected   | Bonaire    | Belnem                   |
| 11.543-1         | <i>Myrmecophilus americanus</i>  | wMsp4, wMsp5,<br>wMame1, wMame2 | <i>Paratrechina longicornis</i> | wLonF        | Curaçao    | Juan Domingo             |
| 11.368-1         | <i>Myrmecophilus americanus</i>  | wMsp4, wMsp5,<br>wMame1, wMame2 | <i>Paratrechina longicornis</i> | wLonF        | Curaçao    | Playa Forti              |
| 11.507-2         | <i>Myrmecophilus americanus</i>  | wMsp4, wMsp5,<br>wMame1, wMame2 | <i>Paratrechina longicornis</i> | Uninfected   | Curaçao    | Koredor                  |
| 11.24-1          | <i>Myrmecophilus americanus</i>  | wMsp4, wMsp5,<br>wMame1, wMame2 | <i>Paratrechina longicornis</i> | Uninfected   | Guadeloupe | Carénage                 |
| 10.454-1         | <i>Myrmecophilus americanus</i>  | wMsp4, wMsp5,<br>wMame1, wMame2 | <i>Paratrechina longicornis</i> | wLonA        | Jamaica    | Negril                   |
| plmy89Mame0<br>1 | <i>Myrmecophilus americanus</i>  | wMsp4, wMsp5,<br>wMame1, wMame2 | <i>Paratrechina longicornis</i> | wLonF        | Malaysia   | Pulau Pinang             |
| plmy89Mame0<br>2 | <i>Myrmecophilus americanus</i>  | wMsp4, wMsp5,<br>wMame1, wMame2 | <i>Paratrechina longicornis</i> | wLonF        | Malaysia   | Pulau Pinang             |

|                  |                                 |                                         |                                 |                     |            |                                               |
|------------------|---------------------------------|-----------------------------------------|---------------------------------|---------------------|------------|-----------------------------------------------|
| plmy89Mame0<br>3 | <i>Myrmecophilus americanus</i> | <i>wMsp4, wMsp5,<br/>wMame1, wMame2</i> | <i>Paratrechina longicornis</i> | <i>wLonF</i>        | Malaysia   | Pulau Pinang                                  |
| 11.268-1         | <i>Myrmecophilus americanus</i> | <i>wMsp4, wMsp5,<br/>wMame1, wMame2</i> | <i>Paratrechina longicornis</i> | <i>wLonA</i>        | Martinique | Le Marin                                      |
| hug88            | <i>Myrmecophilus americanus</i> | <i>wMsp4, wMsp5,<br/>wMame1, wMame2</i> | <i>Paratrechina longicornis</i> | <i>wLonF</i>        | Martinique | Spoutourne                                    |
| 07.642-1         | <i>Myrmecophilus americanus</i> | <i>wMsp4, wMsp5,<br/>wMame1, wMame2</i> | <i>Paratrechina longicornis</i> | Uninfected          | Montserrat | Brades                                        |
| 07.561-1         | <i>Myrmecophilus americanus</i> | <i>wMsp4, wMsp5,<br/>wMame1, wMame2</i> | <i>Paratrechina longicornis</i> | <i>wLonF</i>        | Montserrat | Brades                                        |
| pITH22Mame1      | <i>Myrmecophilus americanus</i> | <i>wMsp4, wMsp5,<br/>wMame1, wMame2</i> | <i>Paratrechina longicornis</i> | <i>wLonF</i>        | Thailand   | Wiset Chai Chan Dist, Ang<br>Thong Province   |
| pITH29Mame1      | <i>Myrmecophilus americanus</i> | <i>wMsp4, wMsp5,<br/>wMame1, wMame2</i> | <i>Paratrechina longicornis</i> | <i>wLonA</i>        | Thailand   | Ban Pom, Phra Nakhon Si<br>Ayutthaya District |
| 12.356-1         | <i>Myrmecophilus americanus</i> | <i>wMsp4, wMsp5,<br/>wMame1, wMame2</i> | <i>Paratrechina longicornis</i> | <i>wLonF</i>        | USA        | Rickenbacker Causeway,<br>Miami, FL           |
| 12.391-1         | <i>Myrmecophilus americanus</i> | <i>wMsp4, wMsp5,<br/>wMame1, wMame2</i> | <i>Paratrechina longicornis</i> | <i>wLonA, wLonF</i> | USA        | Lake Worth, FL                                |
| 14.376-1         | <i>Myrmecophilus americanus</i> | <i>wMsp4, wMsp5,<br/>wMame2</i>         | <i>Paratrechina longicornis</i> | <i>wLonA, wLonF</i> | Singapore  | City Hall                                     |
| 08.813-1         | <i>Myrmecophilus americanus</i> | <i>wMsp4, wMsp5,<br/>wMame2</i>         | <i>Paratrechina longicornis</i> | Uninfected          | USA        | Key West, FL                                  |
| 07.359-1         | <i>Myrmecophilus americanus</i> | <i>wMsp4, wMsp5,<br/>wMame2</i>         | <i>Paratrechina longicornis</i> | <i>wLonF</i>        | Antigua    | Boons Bay                                     |
| 07.507-2         | <i>Myrmecophilus americanus</i> | <i>wMsp4, wMsp5,<br/>wMame2</i>         | <i>Paratrechina longicornis</i> | <i>wLonF</i>        | Antigua    | Long Bay                                      |
| 07.815-1         | <i>Myrmecophilus americanus</i> | <i>wMsp4, wMsp5,<br/>wMame2</i>         | <i>Paratrechina longicornis</i> | Uninfected          | Aruba      | Cas di Paloma                                 |
| 10.62-1          | <i>Myrmecophilus americanus</i> | <i>wMsp4, wMsp5,<br/>wMame2</i>         | <i>Paratrechina longicornis</i> | <i>wLonF</i>        | Bahamas    | New Providence, Coral<br>Harbour              |

|            |                                  |                             |                                 |                     |            |                                 |
|------------|----------------------------------|-----------------------------|---------------------------------|---------------------|------------|---------------------------------|
| 08.694-1   | <i>Myrmecophilus americanus</i>  | <i>wMsp4, wMsp5, wMame2</i> | <i>Paratrechina longicornis</i> | <i>wLonF</i>        | Bonaire    | Bezu                            |
| 08.709-4   | <i>Myrmecophilus americanus</i>  | <i>wMsp4, wMsp5, wMame2</i> | <i>Paratrechina longicornis</i> | Uninfected          | Bonaire    | Kralendijk                      |
| 10.303-1   | <i>Myrmecophilus americanus</i>  | <i>wMsp4, wMsp5, wMame2</i> | <i>Paratrechina longicornis</i> | Uninfected          | Jamaica    | Montego Bay                     |
| hug087     | <i>Myrmecophilus americanus</i>  | <i>wMsp4, wMsp5, wMame2</i> | <i>Paratrechina longicornis</i> | Uninfected          | Martinique | Tartane                         |
| hug101     | <i>Myrmecophilus americanus</i>  | <i>wMsp4, wMsp5, wMame2</i> | <i>Paratrechina longicornis</i> | Uninfected          | Martinique | Le Robert                       |
| 07.382-1   | <i>Myrmecophilus americanus</i>  | <i>wMsp4, wMsp5, wMame2</i> | <i>Paratrechina longicornis</i> | <i>wLonF</i>        | St. Martin | Airport Road                    |
| MameTw01-1 | <i>Myrmecophilus americanus</i>  | <i>wMsp4, wMsp5, wMame2</i> | <i>Paratrechina longicornis</i> | NA                  | Taiwan     | Dacun Township, Changhua County |
| MameTw01-2 | <i>Myrmecophilus americanus</i>  | <i>wMsp4, wMsp5, wMame2</i> | <i>Paratrechina longicornis</i> | NA                  | Taiwan     | Dacun Township, Changhua County |
| MameTw01-3 | <i>Myrmecophilus americanus</i>  | <i>wMsp4, wMsp5, wMame2</i> | <i>Paratrechina longicornis</i> | NA                  | Taiwan     | Dacun Township, Changhua County |
| MameMyn01  | <i>Myrmecophilus americanus</i>  | <i>wMsp4, wMsp5, wMame2</i> | <i>Paratrechina longicornis</i> | <i>wLonA, wLonF</i> | Taiwan     | Taichung                        |
| MameMyn02  | <i>Myrmecophilus americanus</i>  | <i>wMsp4, wMsp5, wMame2</i> | <i>Paratrechina longicornis</i> | <i>wLonA, wLonF</i> | Taiwan     | Taichung                        |
| Ano85.C01  | <i>Myrmecophilus antilucanus</i> | <i>wMsp4</i>                | <i>Anoplolepis gracilipes</i>   | <i>wAgra</i>        | Taiwan     | Da'an Dist., Taipei City        |
| Ano97C01   | <i>Myrmecophilus antilucanus</i> | <i>wMsp4</i>                | <i>Anoplolepis gracilipes</i>   | <i>wAgra</i>        | Taiwan     | Sanwan Township, Miaoli County  |
| Ano97C02   | <i>Myrmecophilus antilucanus</i> | <i>wMsp4</i>                | <i>Anoplolepis gracilipes</i>   | <i>wAgra</i>        | Taiwan     | Sanwan Township, Miaoli County  |
| Ano105C01  | <i>Myrmecophilus antilucanus</i> | <i>wMsp4</i>                | <i>Anoplolepis gracilipes</i>   | <i>wAgra</i>        | Taiwan     | Daan Dist. Taipei               |
| Ano105C02  | <i>Myrmecophilus antilucanus</i> | <i>wMsp4</i>                | <i>Anoplolepis gracilipes</i>   | <i>wAgra</i>        | Taiwan     | Daan Dist. Taipei               |

|            |                                  |            |                               |       |          |                                 |
|------------|----------------------------------|------------|-------------------------------|-------|----------|---------------------------------|
| Ano36.2C01 | <i>Myrmecophilus antilucanus</i> | Uninfected | <i>Anoplolepis gracilipes</i> | wAgra | Malaysia | Subaidah, Gelugor, Pulau Pinang |
| Ano36.2C04 | <i>Myrmecophilus antilucanus</i> | Uninfected | <i>Anoplolepis gracilipes</i> | wAgra | Malaysia | Subaidah, Gelugor, Pulau Pinang |
| Ano36.2C05 | <i>Myrmecophilus antilucanus</i> | Uninfected | <i>Anoplolepis gracilipes</i> | wAgra | Malaysia | Subaidah, Gelugor, Pulau Pinang |
| Ano36.2C06 | <i>Myrmecophilus antilucanus</i> | Uninfected | <i>Anoplolepis gracilipes</i> | wAgra | Malaysia | Subaidah, Gelugor, Pulau Pinang |
| Ano36.2C10 | <i>Myrmecophilus antilucanus</i> | Uninfected | <i>Anoplolepis gracilipes</i> | wAgra | Malaysia | Subaidah, Gelugor, Pulau Pinang |
| mun1-r10   | <i>Myrmecophilus antilucanus</i> | Uninfected | <i>Anoplolepis gracilipes</i> | NA    | Malaysia | Pulau Pinang                    |
| mun1-r11   | <i>Myrmecophilus antilucanus</i> | Uninfected | <i>Anoplolepis gracilipes</i> | NA    | Malaysia | Pulau Pinang                    |
| mun1-r14   | <i>Myrmecophilus antilucanus</i> | Uninfected | <i>Anoplolepis gracilipes</i> | NA    | Malaysia | Pulau Pinang                    |
| mun1-r3    | <i>Myrmecophilus antilucanus</i> | Uninfected | <i>Anoplolepis gracilipes</i> | NA    | Malaysia | Pulau Pinang                    |
| mun1-r6    | <i>Myrmecophilus antilucanus</i> | Uninfected | <i>Anoplolepis gracilipes</i> | NA    | Malaysia | Pulau Pinang                    |
| mun1-r7    | <i>Myrmecophilus antilucanus</i> | Uninfected | <i>Anoplolepis gracilipes</i> | NA    | Malaysia | Pulau Pinang                    |
| mun1-r8    | <i>Myrmecophilus antilucanus</i> | Uninfected | <i>Anoplolepis gracilipes</i> | NA    | Malaysia | Pulau Pinang                    |
| mun1-r9    | <i>Myrmecophilus antilucanus</i> | Uninfected | <i>Anoplolepis gracilipes</i> | NA    | Malaysia | Pulau Pinang                    |
| UnknowC01  | <i>Myrmecophilus antilucanus</i> | Uninfected | <i>Anoplolepis gracilipes</i> | NA    | Malaysia | Pulau Pinang                    |
| Ano95C01   | <i>Myrmecophilus antilucanus</i> | Uninfected | <i>Anoplolepis gracilipes</i> | wAgra | Taiwan   | Hsinpu town, Hsinchu County     |
| Ano95C02   | <i>Myrmecophilus antilucanus</i> | Uninfected | <i>Anoplolepis gracilipes</i> | wAgra | Taiwan   | Hsinpu town, Hsinchu County     |
| Ano95C03   | <i>Myrmecophilus antilucanus</i> | Uninfected | <i>Anoplolepis gracilipes</i> | wAgra | Taiwan   | Hsinpu town, Hsinchu County     |
| Ano95C04   | <i>Myrmecophilus antilucanus</i> | Uninfected | <i>Anoplolepis gracilipes</i> | wAgra | Taiwan   | Hsinpu town, Hsinchu County     |
| Ano95C05   | <i>Myrmecophilus antilucanus</i> | Uninfected | <i>Anoplolepis gracilipes</i> | wAgra | Taiwan   | Hsinpu town, Hsinchu County     |

|             |                                  |            |                               |       |          |                                             |
|-------------|----------------------------------|------------|-------------------------------|-------|----------|---------------------------------------------|
| Ano95C06    | <i>Myrmecophilus antilucanus</i> | Uninfected | <i>Anoplolepis gracilipes</i> | wAgra | Taiwan   | Hsinpu town, Hsinchu County                 |
| AnoTH04C03  | <i>Myrmecophilus antilucanus</i> | Uninfected | <i>Anoplolepis gracilipes</i> | wAgra | Thailand | Nong Sarai, Pak Chong District              |
| AnoBOT01C02 | <i>Myrmecophilus dubius</i>      | Uninfected | <i>Anoplolepis gracilipes</i> | wAgra | Malaysia | Botanical Garden, Jalan Kebun Bunga, Penang |
| AnoBOT01C04 | <i>Myrmecophilus dubius</i>      | Uninfected | <i>Anoplolepis gracilipes</i> | wAgra | Malaysia | Botanical Garden, Jalan Kebun Bunga, Penang |
| AnoBOT01C05 | <i>Myrmecophilus dubius</i>      | Uninfected | <i>Anoplolepis gracilipes</i> | wAgra | Malaysia | Botanical Garden, Jalan Kebun Bunga, Penang |
| AnoBTG01    | <i>Myrmecophilus dubius</i>      | Uninfected | <i>Anoplolepis gracilipes</i> | wAgra | Malaysia | Botanical Garden, Jalan Kebun Bunga, Penang |
| AnoBTG02    | <i>Myrmecophilus dubius</i>      | Uninfected | <i>Anoplolepis gracilipes</i> | wAgra | Malaysia | Botanical Garden, Jalan Kebun Bunga, Penang |
| AnoBTG03    | <i>Myrmecophilus dubius</i>      | Uninfected | <i>Anoplolepis gracilipes</i> | wAgra | Malaysia | Botanical Garden, Jalan Kebun Bunga, Penang |
| AnoBTG04    | <i>Myrmecophilus dubius</i>      | Uninfected | <i>Anoplolepis gracilipes</i> | wAgra | Malaysia | Botanical Garden, Jalan Kebun Bunga, Penang |
| AnoBTG05    | <i>Myrmecophilus dubius</i>      | Uninfected | <i>Anoplolepis gracilipes</i> | wAgra | Malaysia | Botanical Garden, Jalan Kebun Bunga, Penang |
| AnoBTG06    | <i>Myrmecophilus dubius</i>      | Uninfected | <i>Anoplolepis gracilipes</i> | wAgra | Malaysia | Botanical Garden, Jalan Kebun Bunga, Penang |
| AnoKIC01    | <i>Myrmecophilus dubius</i>      | Uninfected | <i>Anoplolepis gracilipes</i> | wAgra | Malaysia | Penang National Park, Pulau Pinang          |
| AnoKIC02    | <i>Myrmecophilus dubius</i>      | Uninfected | <i>Anoplolepis gracilipes</i> | wAgra | Malaysia | Penang National Park, Pulau Pinang          |
| AnoKIC05    | <i>Myrmecophilus dubius</i>      | Uninfected | <i>Anoplolepis gracilipes</i> | wAgra | Malaysia | Penang National Park, Pulau Pinang          |
| mpv-r1      | <i>Myrmecophilus dubius</i>      | Uninfected | <i>Anoplolepis gracilipes</i> | NA    | Malaysia | Pulau Pinang                                |
| mpv-r10     | <i>Myrmecophilus dubius</i>      | Uninfected | <i>Anoplolepis gracilipes</i> | NA    | Malaysia | Pulau Pinang                                |

|             |                               |            |                               |                           |          |                                       |
|-------------|-------------------------------|------------|-------------------------------|---------------------------|----------|---------------------------------------|
| mpv-r11     | <i>Myrmecophilus dubius</i>   | Uninfected | <i>Anoplolepis gracilipes</i> | NA                        | Malaysia | Pulau Pinang                          |
| mpv-r2      | <i>Myrmecophilus dubius</i>   | Uninfected | <i>Anoplolepis gracilipes</i> | NA                        | Malaysia | Pulau Pinang                          |
| mpv-r5      | <i>Myrmecophilus dubius</i>   | Uninfected | <i>Anoplolepis gracilipes</i> | NA                        | Malaysia | Pulau Pinang                          |
| mpv-r6      | <i>Myrmecophilus dubius</i>   | Uninfected | <i>Anoplolepis gracilipes</i> | NA                        | Malaysia | Pulau Pinang                          |
| mpv-r8      | <i>Myrmecophilus dubius</i>   | Uninfected | <i>Anoplolepis gracilipes</i> | NA                        | Malaysia | Pulau Pinang                          |
| mpv-r9      | <i>Myrmecophilus dubius</i>   | Uninfected | <i>Anoplolepis gracilipes</i> | NA                        | Malaysia | Pulau Pinang                          |
| NP01        | <i>Myrmecophilus dubius</i>   | Uninfected | <i>Anoplolepis gracilipes</i> | NA                        | Malaysia | Pulau Pinang                          |
| NP02        | <i>Myrmecophilus dubius</i>   | Uninfected | <i>Anoplolepis gracilipes</i> | NA                        | Malaysia | Pulau Pinang                          |
| UnknowC03   | <i>Myrmecophilus dubius</i>   | Uninfected | <i>Anoplolepis gracilipes</i> | NA                        | Malaysia | Pulau Pinang                          |
| mp-r12      | <i>Myrmecophilus hebaridi</i> | wMsp4      | <i>Anoplolepis gracilipes</i> | NA                        | Malaysia | Pulau Pinang                          |
| mp-r3       | <i>Myrmecophilus hebaridi</i> | wMsp4      | <i>Anoplolepis gracilipes</i> | NA                        | Malaysia | Pulau Pinang                          |
| mp-r5       | <i>Myrmecophilus hebaridi</i> | wMsp4      | <i>Anoplolepis gracilipes</i> | NA                        | Malaysia | Pulau Pinang                          |
| Anomy35C02  | <i>Myrmecophilus hebaridi</i> | wMsp7      | <i>Anoplolepis gracilipes</i> | Uninfected                | Malaysia | Aman Hostel, USM                      |
| Anomy35C03  | <i>Myrmecophilus hebaridi</i> | wMsp7      | <i>Anoplolepis gracilipes</i> | Uninfected                | Malaysia | Aman Hostel, USM                      |
| Anomy35C04  | <i>Myrmecophilus hebaridi</i> | wMsp7      | <i>Anoplolepis gracilipes</i> | Uninfected                | Malaysia | Aman Hostel, USM                      |
| Anomy35C05  | <i>Myrmecophilus hebaridi</i> | wMsp7      | <i>Anoplolepis gracilipes</i> | Uninfected                | Malaysia | Aman Hostel, USM                      |
| Anomy35C06  | <i>Myrmecophilus hebaridi</i> | wMsp7      | <i>Anoplolepis gracilipes</i> | Uninfected                | Malaysia | Aman Hostel, USM                      |
| Anomy36C01  | <i>Myrmecophilus hebaridi</i> | wMsp7      | <i>Anoplolepis gracilipes</i> | wAgra                     | Malaysia | Subaidah,USM                          |
| Cam01C05    | <i>Myrmecophilus hebaridi</i> | wMsp7      | <i>Camponotus</i> sp.         | wCamA1,<br>wCamA2, wCamA3 | Malaysia | Lebuh Relau, Pulau Pinang             |
| mp-r8       | <i>Myrmecophilus hebaridi</i> | wMsp7      | <i>Anoplolepis gracilipes</i> | NA                        | Malaysia | Pulau Pinang                          |
| Ano17.09C01 | <i>Myrmecophilus hebaridi</i> | Uninfected | <i>Anoplolepis gracilipes</i> | wAgra                     | Taiwan   | Hengchun Township,<br>Pingtung County |
| Ano17.09C02 | <i>Myrmecophilus hebaridi</i> | Uninfected | <i>Anoplolepis gracilipes</i> | wAgra                     | Taiwan   | Hengchun Township,<br>Pingtung County |
| Ano17.10C03 | <i>Myrmecophilus hebaridi</i> | Uninfected | <i>Anoplolepis gracilipes</i> | wAgra                     | Taiwan   | Hengchun Township,<br>Pingtung County |

|              |                                  |              |                                              |            |          |                                       |
|--------------|----------------------------------|--------------|----------------------------------------------|------------|----------|---------------------------------------|
| Ano17.12C09  | <i>Myrmecophilus hebaridi</i>    | Uninfected   | <i>Anoplolepis gracilipes</i>                | wAgra      | Taiwan   | Hengchun Township,<br>Pingtung County |
| Ano40.C01    | <i>Myrmecophilus hebaridi</i>    | Uninfected   | <i>Anoplolepis gracilipes</i>                | wAgra      | Taiwan   | Maolin Dist., Kaohsiung<br>City       |
| Anodyu01C01  | <i>Myrmecophilus hebaridi</i>    | Uninfected   | <i>Anoplolepis gracilipes</i>                | Uninfected | Taiwan   | Dacun Township,<br>Changhua County    |
| Anodyu01C02  | <i>Myrmecophilus hebaridi</i>    | Uninfected   | <i>Anoplolepis gracilipes</i>                | Uninfected | Taiwan   | Dacun Township,<br>Changhua County    |
| Anodyu01C03  | <i>Myrmecophilus hebaridi</i>    | Uninfected   | <i>Anoplolepis gracilipes</i>                | Uninfected | Taiwan   | Dacun Township,<br>Changhua County    |
| Anodyu01C04  | <i>Myrmecophilus hebaridi</i>    | Uninfected   | <i>Anoplolepis gracilipes</i>                | Uninfected | Taiwan   | Dacun Township,<br>Changhua County    |
| AnoNT01c03   | <i>Myrmecophilus hebaridi</i>    | Uninfected   | <i>Anoplolepis gracilipes</i>                | wAgra      | Taiwan   | Chushan Township,<br>Nantou County    |
| AnoNT01c05   | <i>Myrmecophilus hebaridi</i>    | Uninfected   | <i>Anoplolepis gracilipes</i>                | wAgra      | Taiwan   | Chushan Township,<br>Nantou County    |
| AnoNT01c07   | <i>Myrmecophilus hebaridi</i>    | Uninfected   | <i>Anoplolepis gracilipes</i>                | wAgra      | Taiwan   | Chushan Township,<br>Nantou County    |
| AnoTH04C01   | <i>Myrmecophilus hebaridi</i>    | Uninfected   | <i>Anoplolepis gracilipes</i>                | Uninfected | Thailand | Nong Sarai, Pak Chong<br>District     |
| AnoTH04C05   | <i>Myrmecophilus hebaridi</i>    | Uninfected   | <i>Anoplolepis gracilipes</i>                | Uninfected | Thailand | Nong Sarai, Pak Chong<br>District     |
| AnoTH04C06   | <i>Myrmecophilus hebaridi</i>    | Uninfected   | <i>Anoplolepis gracilipes</i>                | Uninfected | Thailand | Nong Sarai, Pak Chong<br>District     |
| pheton01.C01 | <i>Myrmecophilus quadrispina</i> | wMsp2        | <i>Carebara</i> sp. ( <i>Pheidologeton</i> ) | Uninfected | Taiwan   | Shalu Dist., Taichung City            |
| pheton01.C02 | <i>Myrmecophilus quadrispina</i> | wMsp2        | <i>Carebara</i> sp. ( <i>Pheidologeton</i> ) | Uninfected | Taiwan   | Shalu Dist., Taichung City            |
| pheton01.C04 | <i>Myrmecophilus quadrispina</i> | wMsp2        | <i>Carebara</i> sp. ( <i>Pheidologeton</i> ) | Uninfected | Taiwan   | Shalu Dist., Taichung City            |
| PI330.C01    | <i>Myrmecophilus quadrispina</i> | wMsp2, wMsp3 | <i>Paratrechina longicornis</i>              | wLonF      | Taiwan   | Taiping Dist., Taichung<br>City       |



|             |                                  |            |                               |       |        |                                    |
|-------------|----------------------------------|------------|-------------------------------|-------|--------|------------------------------------|
| Ano95C20    | <i>Myrmecophilus quadrispina</i> | wMsp5      | <i>Anoplolepis gracilipes</i> | wAgra | Taiwan | Hsinpu town, Hsinchu County        |
| Agr18.1C1   | <i>Myrmecophilus quadrispina</i> | Uninfected | <i>Anoplolepis gracilipes</i> | NA    | Taiwan | New Taipei City                    |
| Agr18.1C2   | <i>Myrmecophilus quadrispina</i> | Uninfected | <i>Anoplolepis gracilipes</i> | NA    | Taiwan | New Taipei City                    |
| Agr18.1C3   | <i>Myrmecophilus quadrispina</i> | Uninfected | <i>Anoplolepis gracilipes</i> | NA    | Taiwan | New Taipei City                    |
| Agr18.1C4   | <i>Myrmecophilus quadrispina</i> | Uninfected | <i>Anoplolepis gracilipes</i> | NA    | Taiwan | New Taipei City                    |
| Agr18.1C5   | <i>Myrmecophilus quadrispina</i> | Uninfected | <i>Anoplolepis gracilipes</i> | NA    | Taiwan | New Taipei City                    |
| Agr18.1C6   | <i>Myrmecophilus quadrispina</i> | Uninfected | <i>Anoplolepis gracilipes</i> | NA    | Taiwan | New Taipei City                    |
| Agr18.2C1   | <i>Myrmecophilus quadrispina</i> | Uninfected | <i>Anoplolepis gracilipes</i> | NA    | Taiwan | New Taipei City                    |
| Ano17.06C06 | <i>Myrmecophilus quadrispina</i> | Uninfected | <i>Anoplolepis gracilipes</i> | wAgra | Taiwan | Hengchun Township, Pingtung County |
| Ano68.C01   | <i>Myrmecophilus quadrispina</i> | Uninfected | <i>Anoplolepis gracilipes</i> | wAgra | Taiwan | Wulai Dist., New Taipei City       |
| Ano68.C02   | <i>Myrmecophilus quadrispina</i> | Uninfected | <i>Anoplolepis gracilipes</i> | wAgra | Taiwan | Wulai Dist., New Taipei City       |
| Ano68.C03   | <i>Myrmecophilus quadrispina</i> | Uninfected | <i>Anoplolepis gracilipes</i> | wAgra | Taiwan | Wulai Dist., New Taipei City       |
| Ano68.C04   | <i>Myrmecophilus quadrispina</i> | Uninfected | <i>Anoplolepis gracilipes</i> | wAgra | Taiwan | Wulai Dist., New Taipei City       |
| Ano71.C01   | <i>Myrmecophilus quadrispina</i> | Uninfected | <i>Anoplolepis gracilipes</i> | NA    | Taiwan | Xiulin Township, Hualien County    |
| Ano71.C02   | <i>Myrmecophilus quadrispina</i> | Uninfected | <i>Anoplolepis gracilipes</i> | NA    | Taiwan | Xiulin Township, Hualien County    |
| Ano95C08    | <i>Myrmecophilus quadrispina</i> | Uninfected | <i>Anoplolepis gracilipes</i> | wAgra | Taiwan | Hsinpu town, Hsinchu County        |
| Ano97C03    | <i>Myrmecophilus quadrispina</i> | Uninfected | <i>Anoplolepis gracilipes</i> | wAgra | Taiwan | Sanwan Township, Miaoli County     |
| Ano97C04    | <i>Myrmecophilus quadrispina</i> | Uninfected | <i>Anoplolepis gracilipes</i> | wAgra | Taiwan | Sanwan Township, Miaoli County     |

|              |                                  |            |                                              |                        |          |                               |
|--------------|----------------------------------|------------|----------------------------------------------|------------------------|----------|-------------------------------|
| Phe17.01C03  | <i>Myrmecophilus quadrispina</i> | Uninfected | <i>Pheidole</i> sp.                          | NA                     | Taiwan   | Renai Township, Nantou County |
| Phe17.01C05  | <i>Myrmecophilus quadrispina</i> | Uninfected | <i>Pheidole</i> sp.                          | NA                     | Taiwan   | Renai Township, Nantou County |
| Phe17.01C06  | <i>Myrmecophilus quadrispina</i> | Uninfected | <i>Pheidole</i> sp.                          | NA                     | Taiwan   | Renai Township, Nantou County |
| pheton01.C03 | <i>Myrmecophilus quadrispina</i> | Uninfected | <i>Carebara</i> sp. ( <i>Pheidologeton</i> ) | Uninfected             | Taiwan   | Shalu Dist., Taichung City    |
| pl349C01     | <i>Myrmecophilus quadrispina</i> | Uninfected | <i>Paratrechina longicornis</i>              | wLonA                  | Taiwan   | Kinmen                        |
| pl349C02     | <i>Myrmecophilus quadrispina</i> | Uninfected | <i>Paratrechina longicornis</i>              | wLonA                  | Taiwan   | Kinmen                        |
| pl367C01     | <i>Myrmecophilus quadrispina</i> | Uninfected | <i>Paratrechina longicornis</i>              | wLonF                  | Taiwan   | Huisun, Nantou County         |
| pl367C02     | <i>Myrmecophilus quadrispina</i> | Uninfected | <i>Paratrechina longicornis</i>              | wLonF                  | Taiwan   | Huisun, Nantou County         |
| pl368C01     | <i>Myrmecophilus quadrispina</i> | Uninfected | <i>Paratrechina longicornis</i>              | wLonF                  | Taiwan   | Renai Township, Nantou County |
| Cam01C08     | <i>Myrmophilellus pilipes</i>    | wMsp6      | <i>Camponotus</i> sp.                        | wCamA1, wCamA2, wCamA3 | Malaysia | Lebuh Relau, Pulau Pinang     |
| Dia01C02     | <i>Myrmophilellus pilipes</i>    | wMsp6      | <i>Diacamma</i> sp.                          | Uninfected             | Malaysia | Lebuh Relau, Pulau Pinang     |
| mun2-r3-1    | <i>Myrmophilellus pilipes</i>    | wMsp6      | <i>Anoplolepis gracilipes</i>                | NA                     | Malaysia | Pulau Pinang                  |
| Plmy100C01   | <i>Myrmophilellus pilipes</i>    | wMsp6      | <i>Paratrechina longicornis</i>              | wLonF                  | Malaysia | Air Hitam, Pulau Pinang       |
| Cam01C01     | <i>Myrmophilellus pilipes</i>    | Uninfected | <i>Camponotus</i> sp.                        | wCamA1, wCamA2, wCamA3 | Malaysia | Lebuh Relau, Pulau Pinang     |
| Cam01C02     | <i>Myrmophilellus pilipes</i>    | Uninfected | <i>Camponotus</i> sp.                        | wCamA1, wCamA2, wCamA3 | Malaysia | Lebuh Relau, Pulau Pinang     |
| Cam01C03     | <i>Myrmophilellus pilipes</i>    | Uninfected | <i>Camponotus</i> sp.                        | wCamA1, wCamA2, wCamA3 | Malaysia | Lebuh Relau, Pulau Pinang     |
| Cam01C04     | <i>Myrmophilellus pilipes</i>    | Uninfected | <i>Camponotus</i> sp.                        | wCamA1, wCamA2, wCamA3 | Malaysia | Lebuh Relau, Pulau Pinang     |
| Cam01C06     | <i>Myrmophilellus pilipes</i>    | Uninfected | <i>Camponotus</i> sp.                        | wCamA1, wCamA2, wCamA3 | Malaysia | Lebuh Relau, Pulau Pinang     |

|            |                               |            |                                 |                                         |           |                           |
|------------|-------------------------------|------------|---------------------------------|-----------------------------------------|-----------|---------------------------|
| Cam01C07   | <i>Myrmophilellus pilipes</i> | Uninfected | <i>Camponotus</i> sp.           | <i>wCamA1,</i><br><i>wCamA2, wCamA3</i> | Malaysia  | Lebuh Relau, Pulau Pinang |
| Dia01C01   | <i>Myrmophilellus pilipes</i> | Uninfected | <i>Diacamma</i> sp.             | Uninfected                              | Malaysia  | Lebuh Relau, Pulau Pinang |
| mun2-r1-1  | <i>Myrmophilellus pilipes</i> | Uninfected | <i>Anoplolepis gracilipes</i>   | NA                                      | Malaysia  | Pulau Pinang              |
| mun2-r1-2  | <i>Myrmophilellus pilipes</i> | Uninfected | <i>Anoplolepis gracilipes</i>   | NA                                      | Malaysia  | Pulau Pinang              |
| mun2-r2-1  | <i>Myrmophilellus pilipes</i> | Uninfected | <i>Anoplolepis gracilipes</i>   | NA                                      | Malaysia  | Pulau Pinang              |
| mun2-r3-2  | <i>Myrmophilellus pilipes</i> | Uninfected | <i>Anoplolepis gracilipes</i>   | NA                                      | Malaysia  | Pulau Pinang              |
| mun2-r4-1  | <i>Myrmophilellus pilipes</i> | Uninfected | <i>Anoplolepis gracilipes</i>   | NA                                      | Malaysia  | Pulau Pinang              |
| mun2-r4-2  | <i>Myrmophilellus pilipes</i> | Uninfected | <i>Anoplolepis gracilipes</i>   | NA                                      | Malaysia  | Pulau Pinang              |
| mun2-r4-3  | <i>Myrmophilellus pilipes</i> | Uninfected | <i>Anoplolepis gracilipes</i>   | NA                                      | Malaysia  | Pulau Pinang              |
| pIMYBPC01  | <i>Myrmophilellus pilipes</i> | Uninfected | <i>Paratrechina longicornis</i> | NA                                      | Malaysia  | Pulau Pinang              |
| pIMYUSMC01 | <i>Myrmophilellus pilipes</i> | Uninfected | <i>Paratrechina longicornis</i> | NA                                      | Malaysia  | Pulau Pinang              |
| pIMYUSMC02 | <i>Myrmophilellus pilipes</i> | Uninfected | <i>Paratrechina longicornis</i> | NA                                      | Malaysia  | Pulau Pinang              |
| PISG04C01  | <i>Myrmophilellus pilipes</i> | Uninfected | <i>Paratrechina longicornis</i> | <i>wLonA</i>                            | Singapore | Mount Faber Park          |
| plmy100C02 | <i>Myrmophilellus pilipes</i> | Uninfected | <i>Paratrechina longicornis</i> | <i>wLonF</i>                            | Malaysia  | Air Hitam, Pulau Pinang   |

**Table S4 Primer sequences for *wsp* gene and PCR conditions used in this study**

| <i>Wolbachia</i> type      | Name | Sequences (5'-3')        | Ta (°C) | Size (bp) | Reference  |
|----------------------------|------|--------------------------|---------|-----------|------------|
| <i>Wolbachia</i> universal | 81F  | TGGTCCAATAAGTGATGAAGAAAC | 50      | 610       | [23]       |
|                            | 691R | AAAAATTAAACGCTACTCCA     |         |           |            |
| <i>wMsp4/wCamA3</i>        | M4F  | GGACACAGACATTCATAATCCA   | 54      | 308       | This study |
|                            | M4R  | TATAGGTTTTGACCATCCACG    |         |           |            |
| <i>wMsp5</i>               | M5F  | AAAGCTTTTGATCCTTTCA      | 54      | 408       | This study |
|                            | M4R  | GCTAGCACCATAAGARCCA      |         |           |            |
| <i>wMame1</i>              | A1F  | AAGGTGATAAAGATCAAGATCCTT | 54      | 439       | This study |
|                            | A1R  | TACCATCACCTTAGTTGTTGCAT  |         |           |            |
| <i>wMame2</i>              | A2F  | AGATAATAAAGACCAAGACCT    | 54      | 285       | This study |
|                            | A2R  | GGACTCTTTAAAGGATTGCTA    |         |           |            |
| <i>wCamA1/wLonA</i>        | F    | TCCAGCAATTGCAGACAGTT     | 58      | 292       | This study |
|                            | R    | GCTTGCTGCAGCAGTATCTTTA   |         |           |            |
| <i>wCamA2</i>              | F    | TATTACCTATAAGAAAGACAGTAG | 54      | 455       | This study |
|                            | R    | CCTTTGCCGTCTTTGTCAGT     |         |           |            |

## Figure legends

**Figure S1.** Alignment of Illumina paired-end sequence reads to the reference MLST sequences (A) *hcpA*, (B) *ftsZ*, (C) *gatB*, (D) *coxA* and (E) *fbpA* of *wLonF* (top), *wMsp4* (middle), and *wMsp5* (bottom). Note only those reads perfectly matching the reference sequences were shown.

**Figure S2** Genealogical relationships of *Wolbachia* strains. (a) Maximum Likelihood (ML) tree and (b) subtrees for *Wolbachia* strains based on *wsp* gene. Black circles indicate sequences data generated in this study. Strains are represented by the infected arthropod host species with which they are associated. *Wolbachia* from ant crickets, ants, and orthoptera are colored yellow, blue, and pink respectively.

(A) Reference  
wLonF

*hcpA* gene

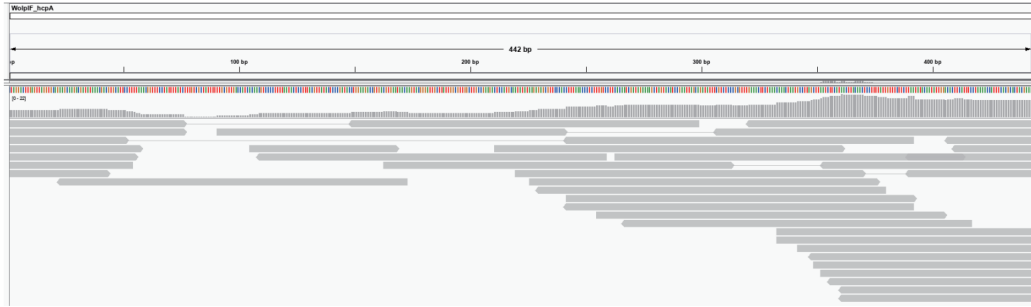

Reference  
wMsp4

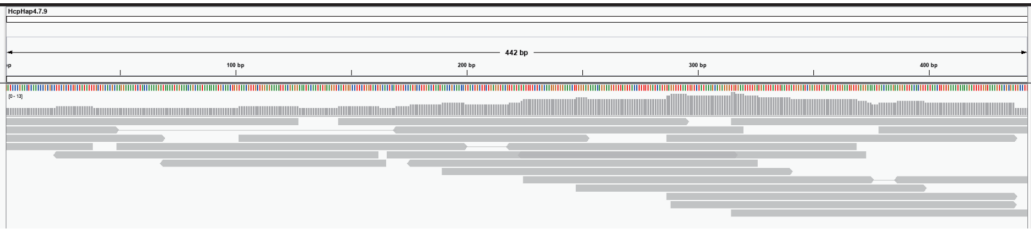

Reference  
wMsp5

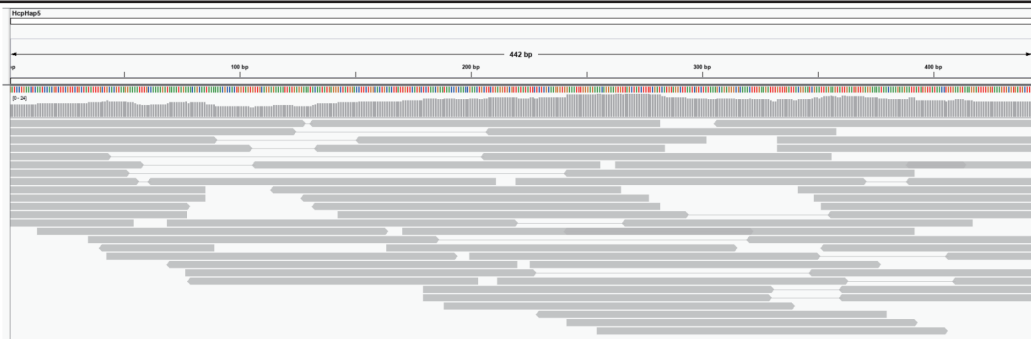

Alignment for  
three strains

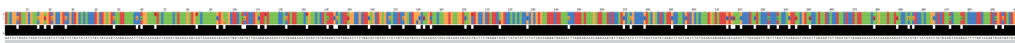

Figure S1

(B)

*ftsZ* gene

Reference  
wLonF

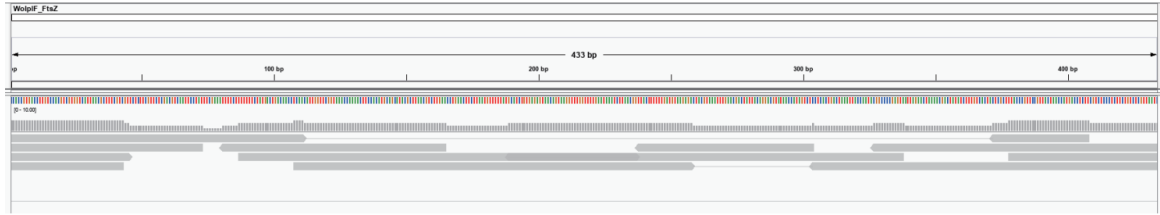

Reference  
wMsp4

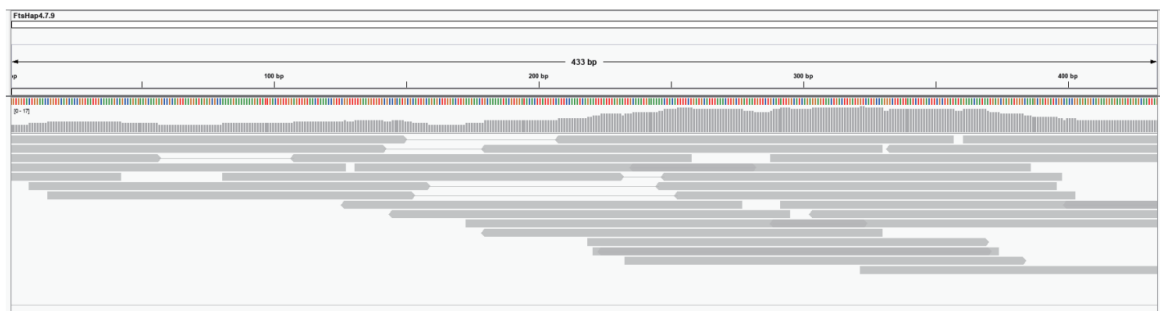

Reference  
wMsp5

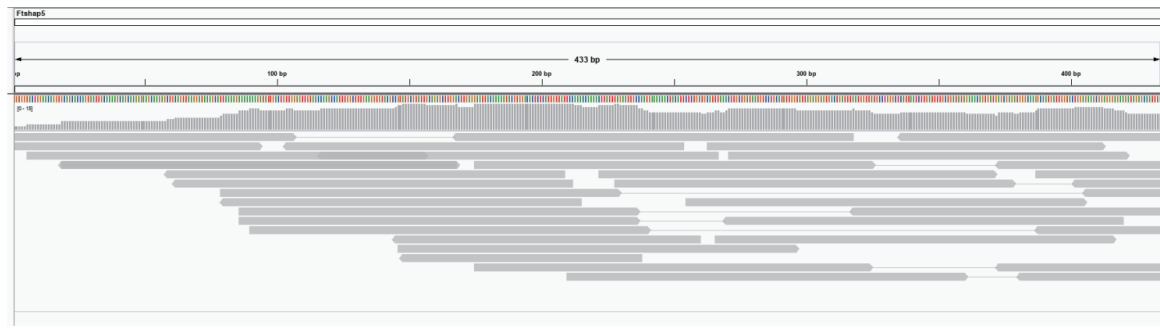

Alignment for  
three strains

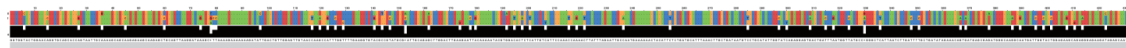

Figure S1 (Continued)

(C)

*gatB* gene

Reference  
wLonF

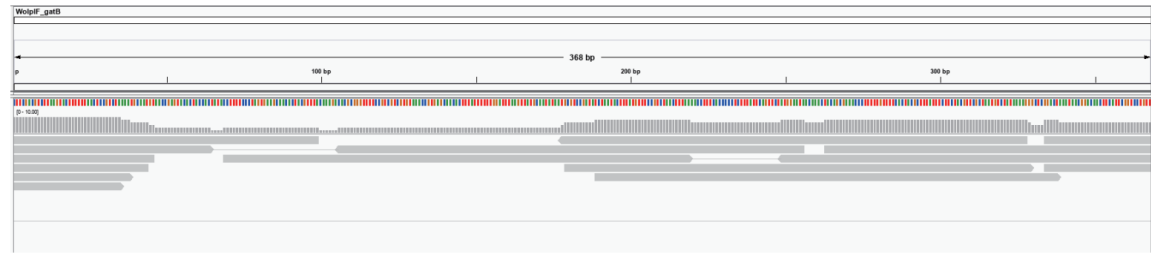

Reference  
wMsp4

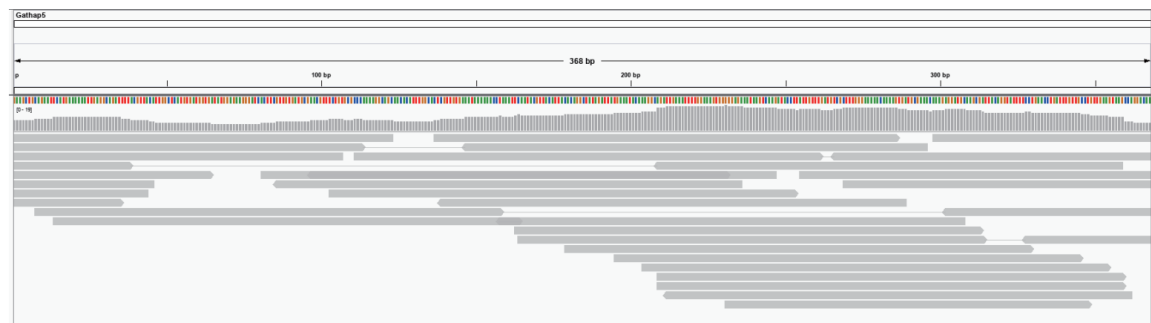

Reference  
wMsp5

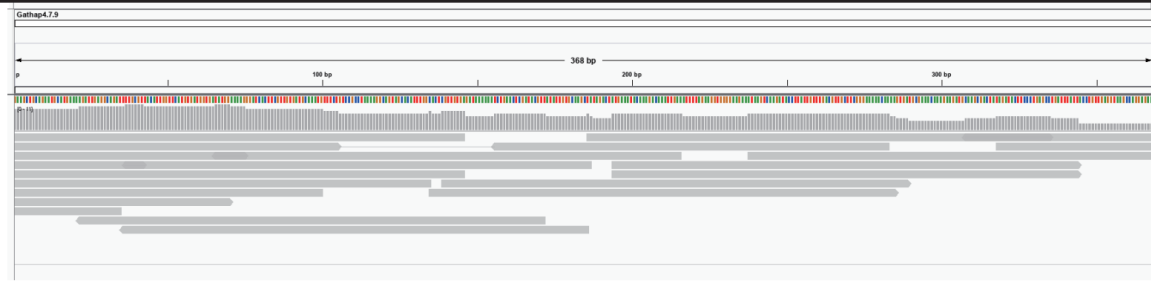

Alignment for  
three strains

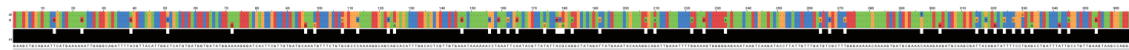

Figure S1 (Continued)



(D)

*coxA* gene

Reference  
wLonF

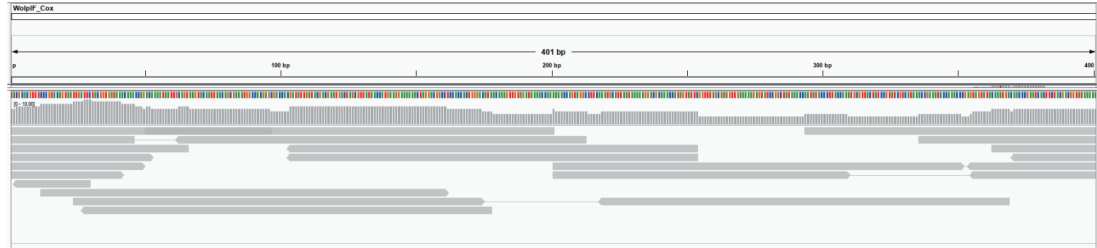

Reference  
wMsp4

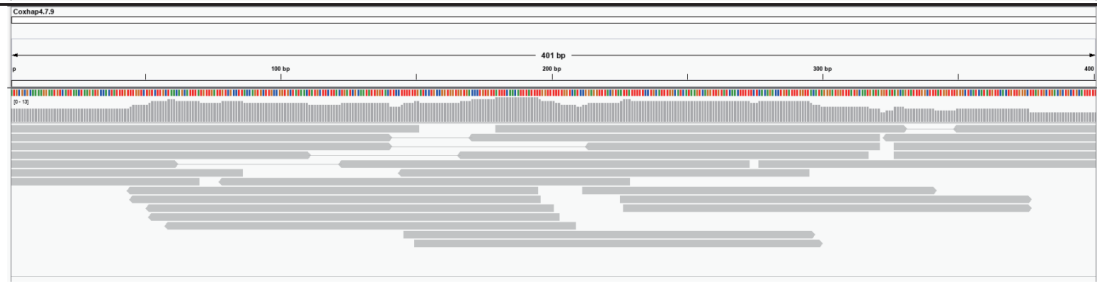

Reference  
wMsp5

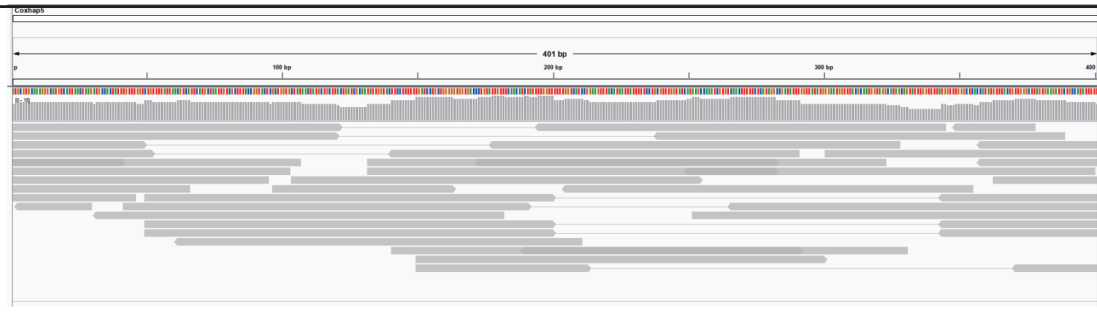

Alignment for  
three strains

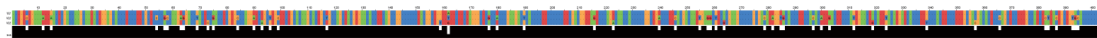

Figure S1 (Continued)

(E)

*fbpA* gene

Reference  
wLonF

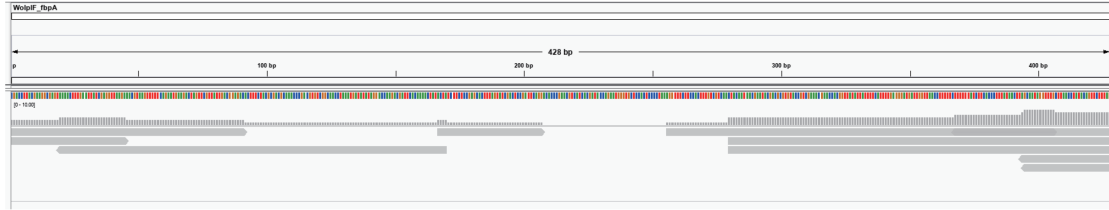

Reference  
wMsp4

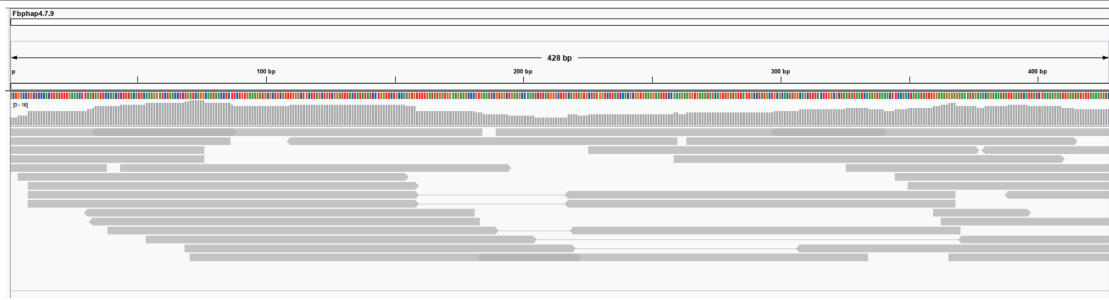

Reference  
wMsp5

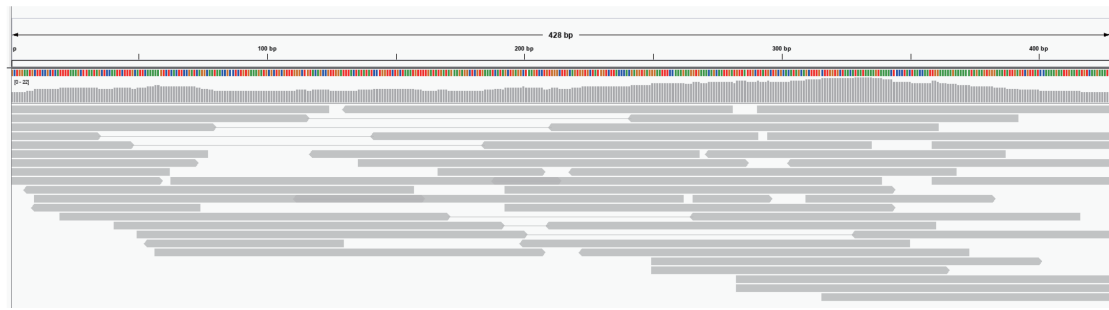

Alignment for  
three strains

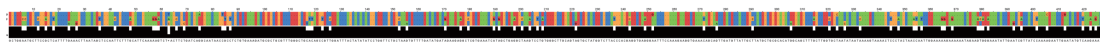

Figure S1 (Continued)

(a)

Wolbachia from

- Myrmecophiliidae
- Formicidae
- Orthoptera

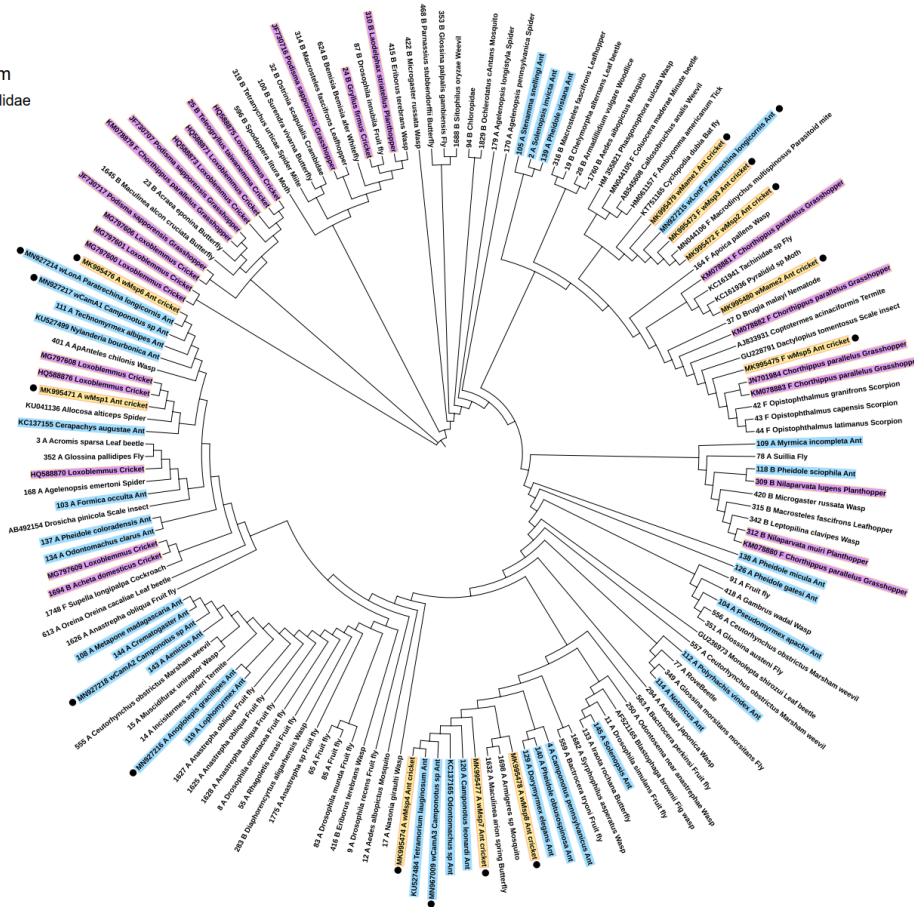

(b)

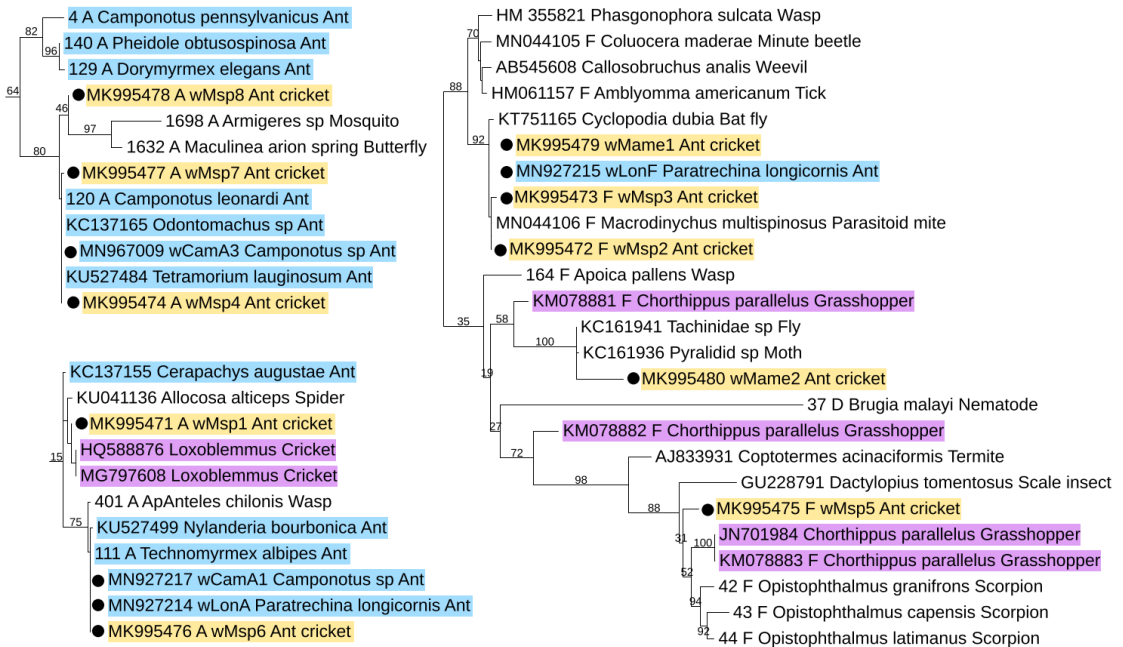

0.01

Figure S2
